# Supplementary material for: MicroRNAs regulate KDM5 histone demethylases in breast cancer cells
Source: Royal Society of Chemistry journal article supplement (doi:10.1039/c5mb00513b), 2015-11-23
Supplement: c5mb00513b5.pdf [file c5mb00513b5.pdf]

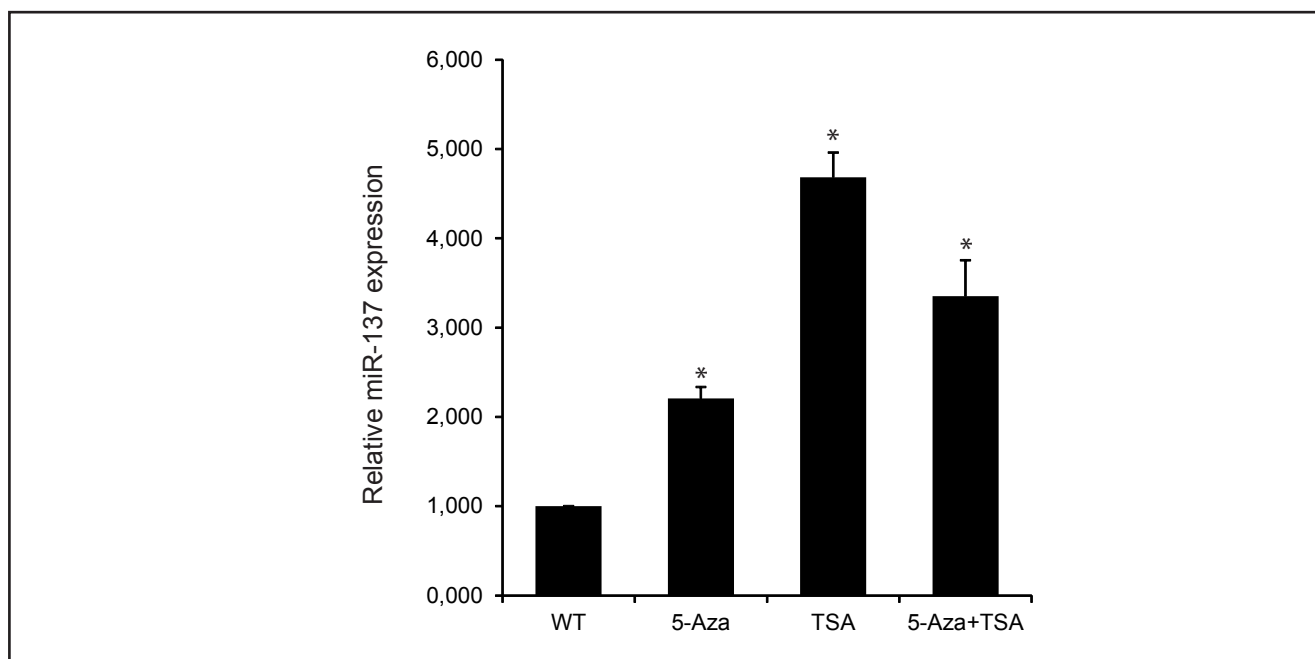

**Fig. S3 (related to Fig. 1B): MiR-137 is epigenetically regulated in breast cancer cells.** MiR-137 expression was evaluated by RT-qPCR in MCF7 cells, treated or not with 5-Aza (2,5 $\mu$ M) and/or TSA (200mM). Results are standardized with respect to the endogenous control RUN6B (n=2) (\*=p>0,05).
