# Supplementary material for: MicroRNAs regulate KDM5 histone demethylases in breast cancer cells
Source: Royal Society of Chemistry journal article supplement (doi:10.1039/c5mb00513b), 2015-11-23
Supplement: c5mb00513b6.pdf [file c5mb00513b6.pdf]

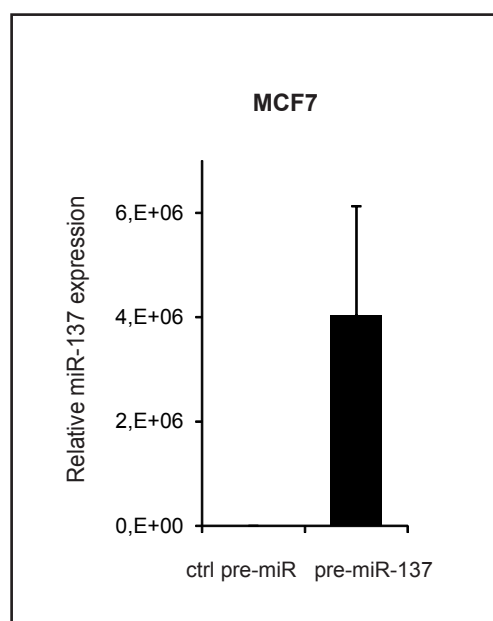

**Fig. S4 (related to Figs. 2A, B): Mature miR-137 expression in proliferation experiments.** Mature miR-137 expression was evaluated by RT-qPCR analysis. Transcript levels were measured following transfection of MCF-7 cells with miR-137 precursor (pre-miR-137). Results are normalized with respect to the endogenous control RNU6B (n=3).
