# Supplementary material for: MicroRNAs regulate KDM5 histone demethylases in breast cancer cells
Source: Royal Society of Chemistry journal article supplement (doi:10.1039/c5mb00513b), 2015-11-23
Supplement: c5mb00513b7.pdf [file c5mb00513b7.pdf]

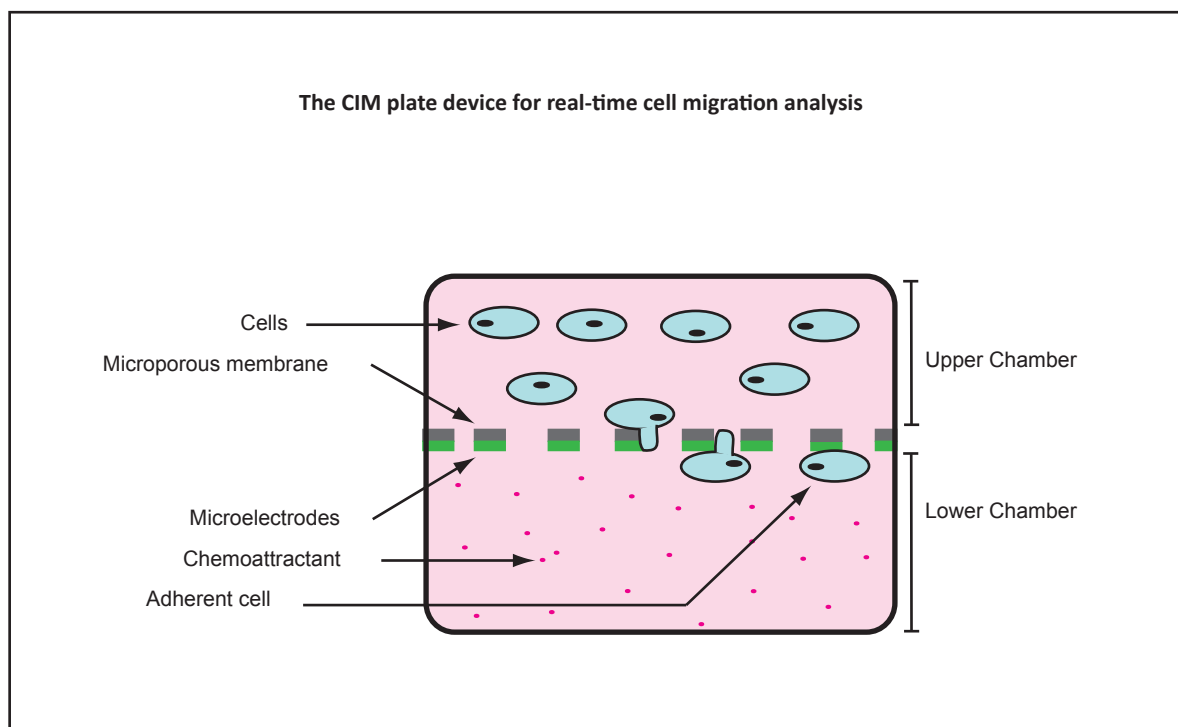

**Fig. S5 (related to Fig. 2): Graphical representation of the CIM-Plate 16 device for real-time cell migration analysis.** The xCELLigence instrument uses the CIM-Plate 16 which features microelectronic sensors integrated onto the underside of microporous polyethylene terephthalate membrane of a boyden-like chamber. As cells migrate from the upper chamber through the membrane into the bottom chamber in response to chemoattractant, they contact and adhere to the electronic sensor on the impedance changes are automatically and continuously by the RTCA instrument. Therefore, cell migration can be monitored via the cell index profile.
