# Supplementary material for: MicroRNAs regulate KDM5 histone demethylases in breast cancer cells
Source: Royal Society of Chemistry journal article supplement (doi:10.1039/c5mb00513b), 2015-11-23
Supplement: c5mb00513b10.pdf [file c5mb00513b10.pdf]

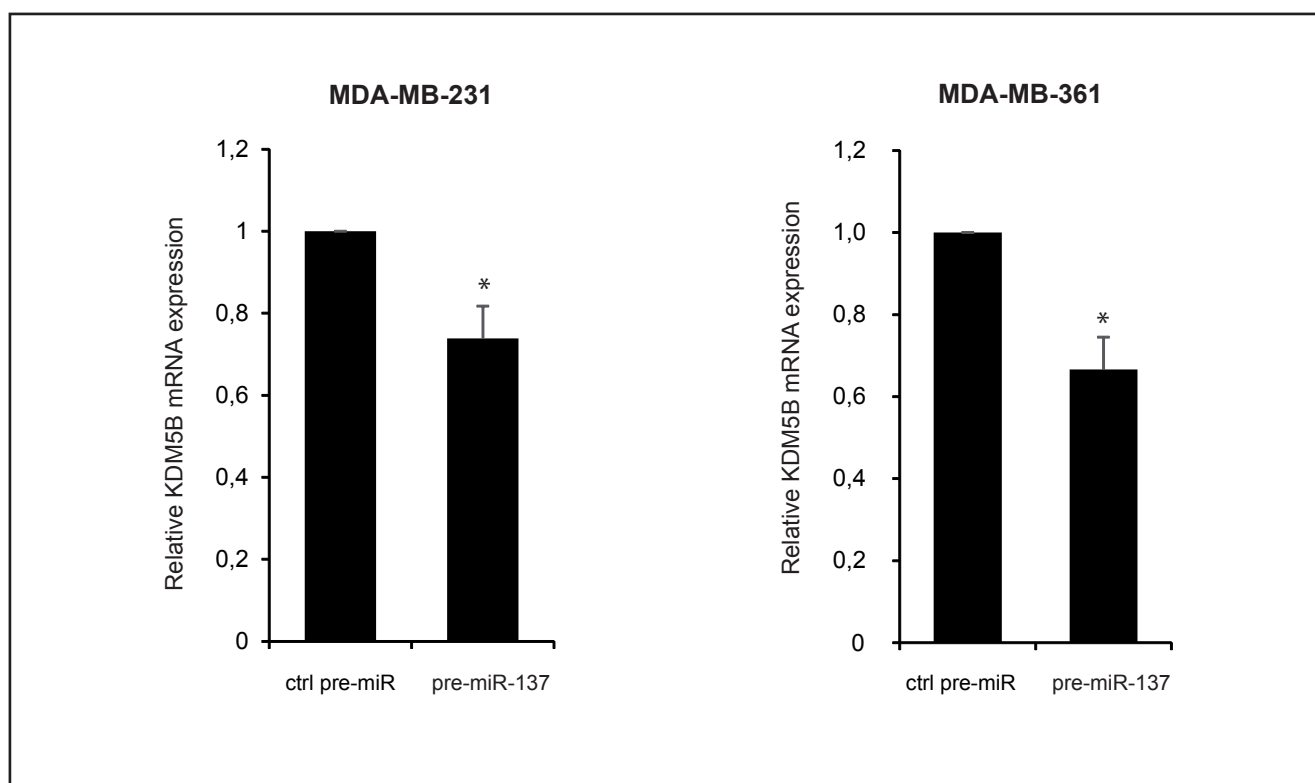

**Fig. S7 (related to Fig. 3B): KDM5B is a direct target of miR-137 in breast cancer cells.** Following transfection of MDA-MB-231 or MDA-MB-361 cells with miR-137 precursors (pre-miR-137) or with a scrambled pre-miR used as a negative control (ctrl pre-miR), KDM5B mRNA levels were analysed by real-time qPCR and standardized with respect to the endogenous control GAPDH. Relative expression levels were determined for control-pre-miR- and pre-miR-137-transfected cells (n=2) (\*=p<0,05).
