# Supplementary material for: MicroRNAs regulate KDM5 histone demethylases in breast cancer cells
Source: Royal Society of Chemistry journal article supplement (doi:10.1039/c5mb00513b), 2015-11-23
Supplement: c5mb00513b11.pdf [file c5mb00513b11.pdf]

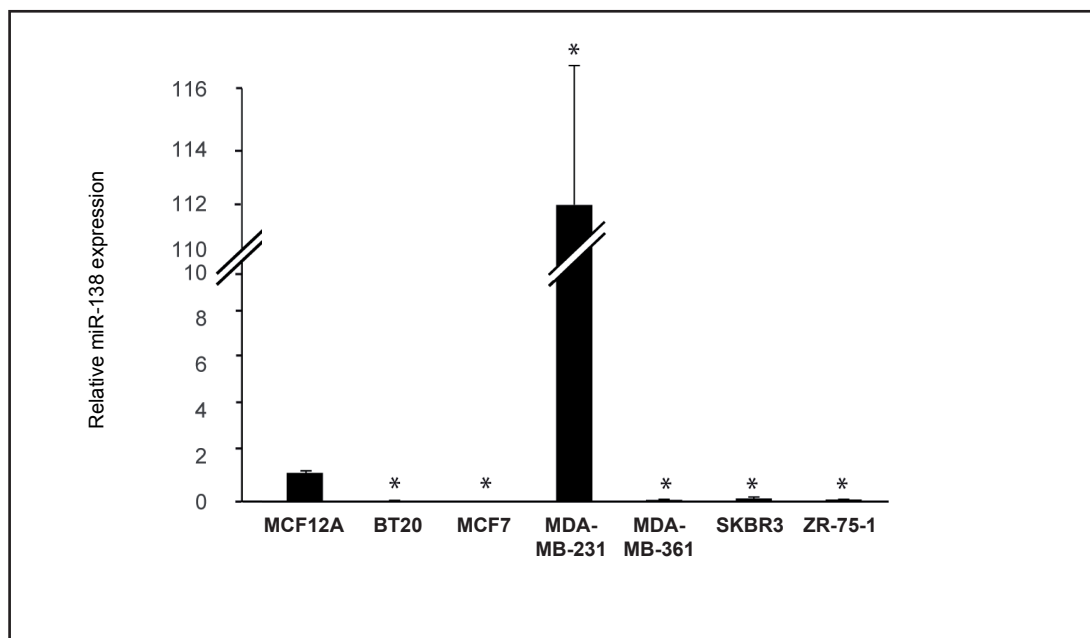

**Fig S8 (related to Fig. 4B). MiR-138 is downregulated in breast cancer.** MiR-138 expression was analyzed by TaqMan RT-qPCR in non-tumorigenic human mammary epithelial cell line (MCF12A) and in six breast cancer cell lines (BT20, MCF7, MDA-MB-231, MDA-MB-361, SKBR3, and ZR-75-1). Results are normalized with respect to the endogenous control RNU6B (\*= $p < 0,05$ ) (n=3).
