# Supplementary material for: MicroRNAs regulate KDM5 histone demethylases in breast cancer cells
Source: Royal Society of Chemistry journal article supplement (doi:10.1039/c5mb00513b), 2015-11-23
Supplement: c5mb00513b12.pdf [file c5mb00513b12.pdf]

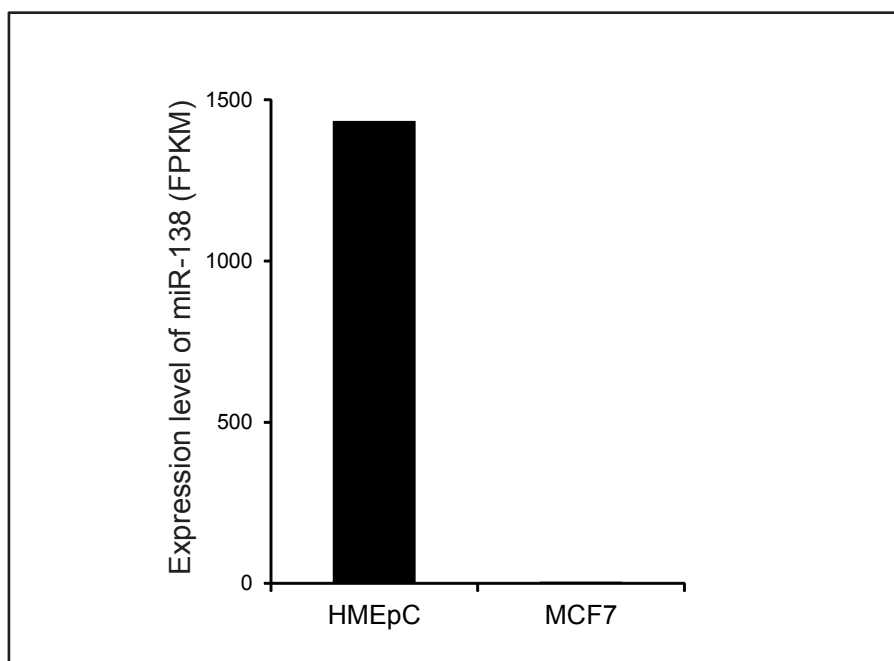

**Fig. S9. (related to Fig. 4B): MiR-138 is less expressed in MCF7 breast cancer cells than in HMEpC normal cells.** Levels of miR-138 from RNA-seq data of ENCODE consortium are given as numbers of RNA-seq fragments per kilobase of transcript per million fragments mapped (FPKM) for breast cancer cell line MCF-7 and human mammary epithelial cell, HMEpC.
